# Supplementary figures and images for: Easy quantitative assessment of genome editing by sequence trace decomposition
Source: Oxford University Press journal article supplement (doi:10.1093/nar/gku936), 2014-10-09

Supplementary Figure S1

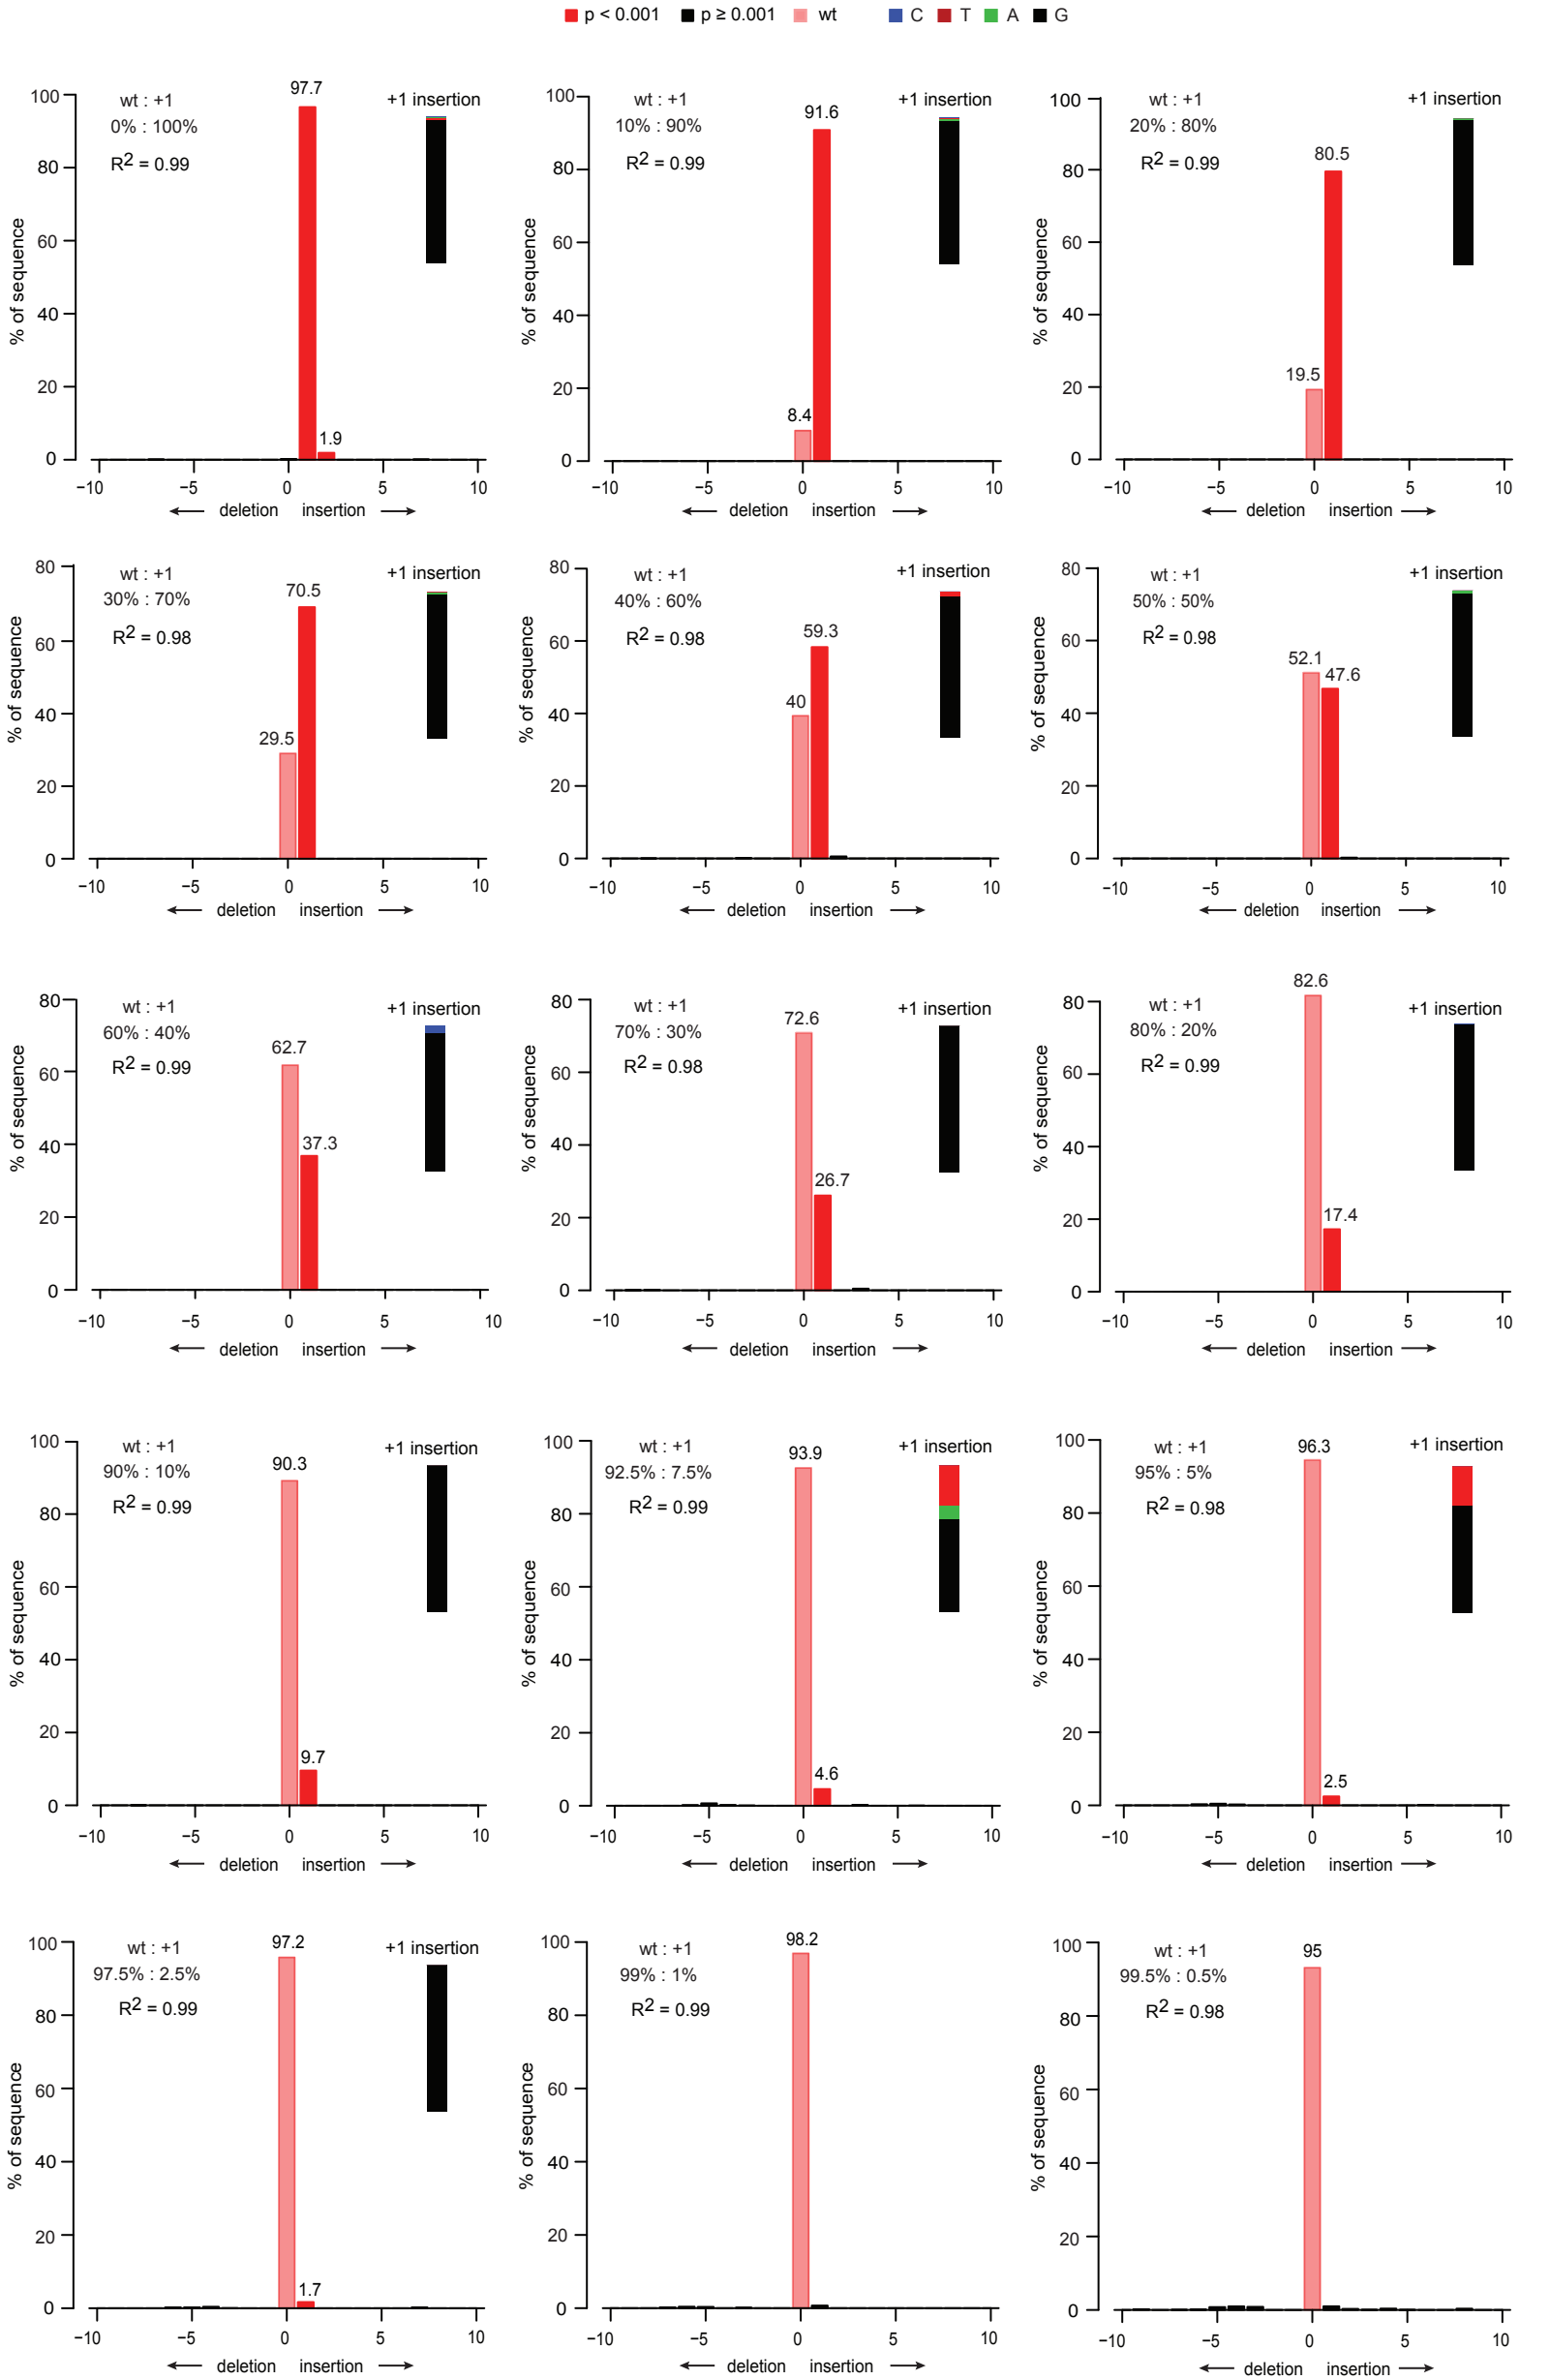

Supplement: gku936_Supplementary_Data.zip [file gku936_Supplementary_Data.zip]

Supplementary Figure S2

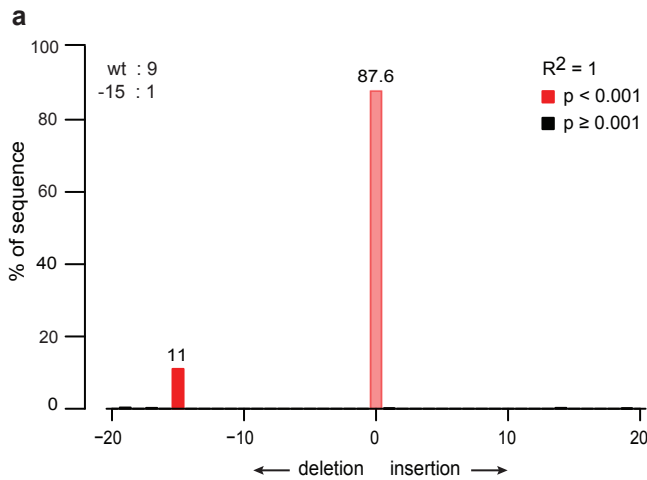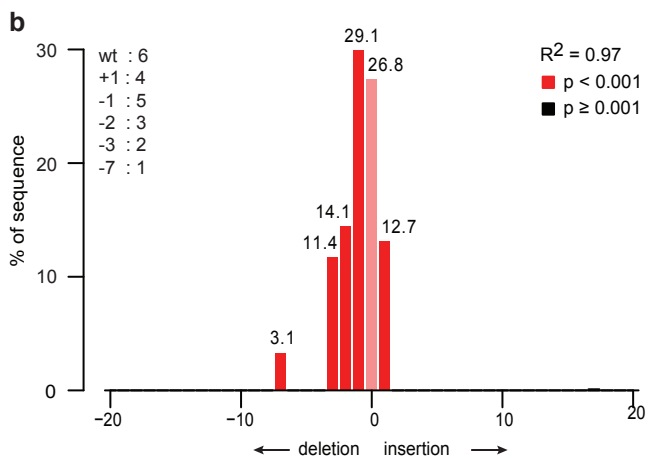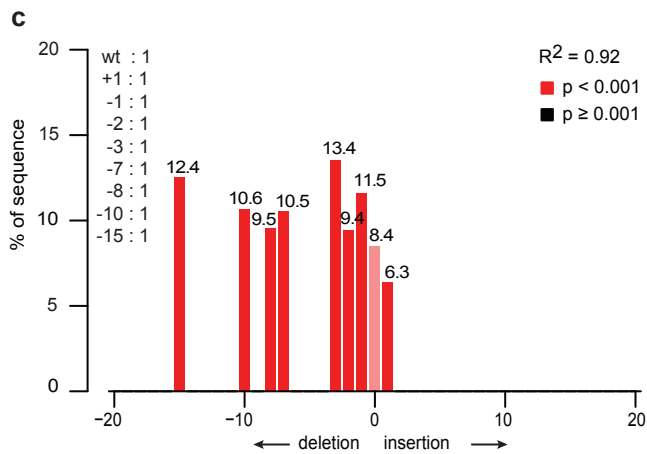

Supplement: gku936_Supplementary_Data.zip [file gku936_Supplementary_Data.zip]

# Supplementary Figure S3

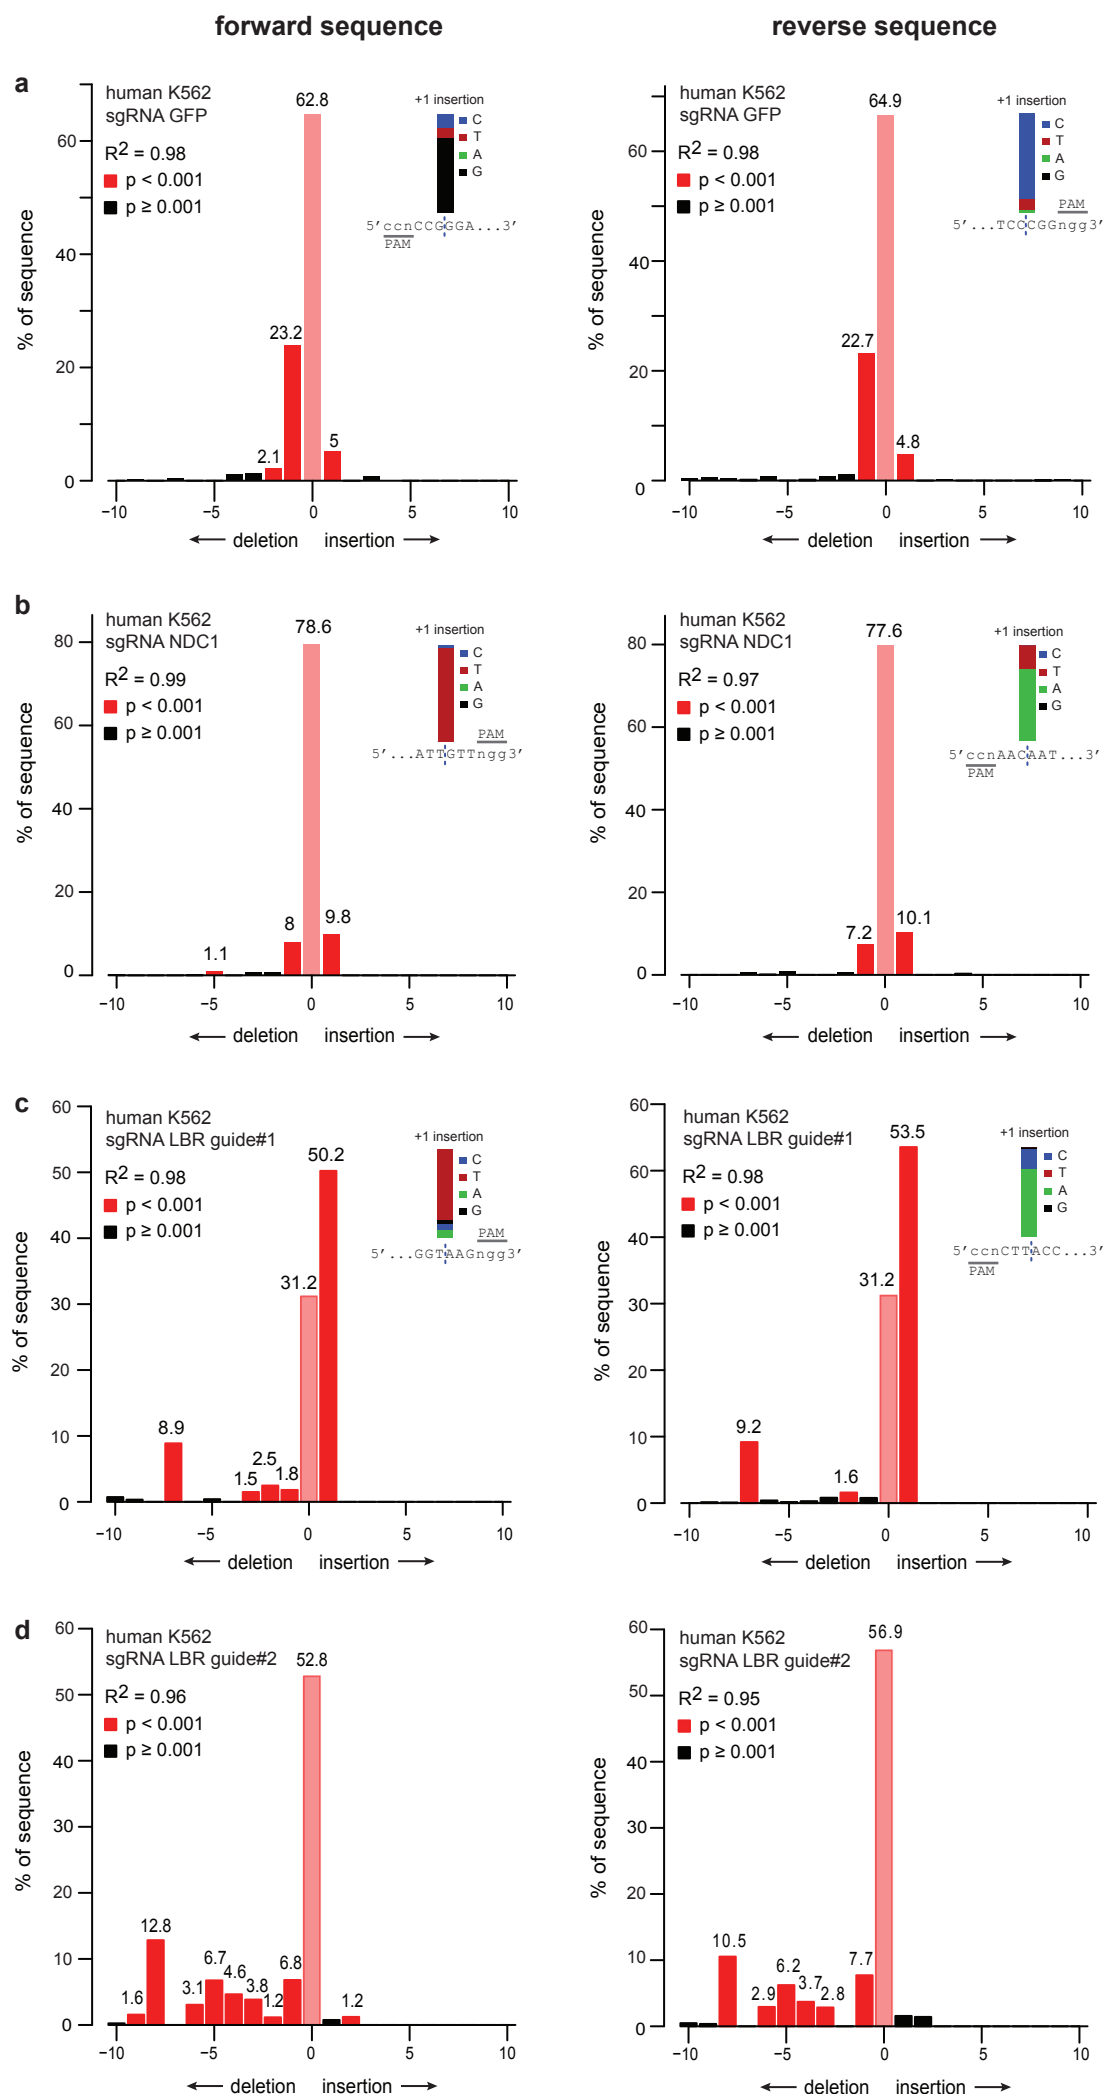

Supplement: gku936_Supplementary_Data.zip [file gku936_Supplementary_Data.zip]
